# Supplementary material
Source: publisher figshare collection journal article supplement (https://gsajournals.figshare.com/ndownloader/files/28873737)
Supplement: Supplementary file 1 [file 28873737]

## Sheet: Sheet1
	Table S2 MLEs transposase references used as queries in the tBLASTN search (ACcession number,Species,Group)
	MLE Sufamily Irritans
	AC.number	Species	Group
	KFM57566.1	Stegodyphus mimosarum	Arachnid
	XP_035224980.1	Stegodyphus dumicola	Arachnid
	XP_023310469.1	Anoplophora glabripennis	Insect
	APL98296.1	Bactrocera tryoni	Insect
	APL98287.1	Bactrocera tryoni	Insect
	CAP20047.1	Portunus granulatus	Crustacean
	CAJ76986.1	Pachygrapsus marmoratus	Crustacean
	MLE Subfamily Elegans
	AC.number	Species
	F11D11.9	Caenorhabditis elegans	Nematode
	DQ138284.1	Adineta vaga	Rotifer
	F11D11.9	Caenorhabditis elegans	Nematode
	MLE Subfamily Cecropia
	AC.number	Species
	BAA23532.1	Bombyx mori	Insect
	ABQ88321.1	Homo sapiens(construit)	Homme
	MLE Subfamily mellifera
	AC.number	Species
	AAO12861.1	Apis mellifera	Insect
	AAO12862.1	Chymomyza amoena	Insect
	AAO12863.1	Forficula auricularia	Insect
	MLE Subfamily mauritiana
	AC.number	Species
	AAK54758.1	Musca domestica	Insect
	AAA28678.1	Drosophila mauritiana	Insect
	APL98294.1	Bactrocera tryoni	Insect
	AAC28261.1	Drosophila teissieri	Insect
